# Supplementary material
Source: MDPI journal article supplement (https://www.mdpi.com/2073-4441/13/14/1948)

## Supplementary

# Changing Land Use and Population Density Are Degrading Water Quality in the Lower Mekong Basin

Flavia Tromboni <sup>1,\*</sup>, Thomas E. Dilts <sup>2</sup>, Sarah E. Null <sup>3</sup>, Sapana Lohani <sup>4</sup>, Peng Bun Ngor <sup>5</sup>, Savoeurn Soum <sup>6</sup>, Zeb Hogan <sup>1</sup> and Sudeep Chandra <sup>1</sup>

<sup>1</sup> Global Water Center and Department of Biology, University of Nevada, 1664 N. Virginia Street, Reno, NV 89557, USA; zhogan@unr.edu (Z.H.); sudeep@unr.edu (S.C.)

<sup>2</sup> Department of Natural Resources and Environmental Science, University of Nevada, Reno, NV 89557, USA; tdilts@unr.edu

<sup>3</sup> Department of Watershed Sciences, Utah State University, Logan, UT 84322, USA; sarah.null@usu.edu

<sup>4</sup> W.A. Franke College of Forestry and Conservation, University of Montana, Missoula, MT 59812, USA; sapana.lohani@mso.umt.edu

<sup>5</sup> Inland Fisheries Research and Development Institute, Fisheries Administration, No. 186, Preah Norodom Blvd., Phnom Penh 12300, Cambodia; pengbun.ngor@gmail.com

<sup>6</sup> Centre for Biodiversity Conservation, Royal University of Phnom Penh, Russian Boulevard, Phnom Penh 12000, Cambodia; sormsavoeurn168@gmail.com

\* Correspondence: ftromboni@unr.edu; flavia.tromboni@gmail.com

Supplementary Material 1. Watershed-station names and mean (2000-2017) water quality parameters  $\pm$  standard deviation in the dry season. “n” refers to number of observations.

| Station name            | Country  | Location of<br>Dam | TSS mg/L                | NO <sub>3</sub> mg/L | NH <sub>4</sub> <sup>+</sup> mg/L | TN mg/L             | PO <sub>4</sub> <sup>3-</sup> mg/L | TP mg/L             | DO mg/L             |
|-------------------------|----------|--------------------|-------------------------|----------------------|-----------------------------------|---------------------|------------------------------------|---------------------|---------------------|
| 1) Backprea             | Cambodia | No dam             | 86.42 ± 29.48<br>n=15   | 0.19 ± 0.10<br>n=15  | 0.15 ± 0.05<br>n=15               | 0.58 ± 0.26<br>n=11 | 0.01 ± NA<br>n=1                   | 0.14 ± 0.05<br>n=15 | 5.43 ± 1.56<br>n=15 |
| 2) Kampong Thom         | Cambodia | Upstream           | 77.83 ± 38.99<br>n=6    | 0.16 ± 0.13<br>n=6   | 0.05 ± 0.03<br>n=6                | 0.27 ± 0.07<br>n=2  | 0.00 ± NA<br>n=1                   | 0.09 ± 0.04<br>n=6  | 6.62 ± 1.83<br>n=6  |
| 3) Kampong Toul         | Cambodia | Upstream           | 78.51 ± 46.70<br>n=4    | 0.11 ± 0.06<br>n=4   | 0.03 ± 0.01<br>n=4                | NA<br>n=4           | 0.02 ± 0.02<br>n=4                 | 0.03 ± 0.02<br>n=4  | 6.61 ± 0.55<br>n=4  |
| 4) Kampong Thmar        | Cambodia | Upstream           | 58.37 ± 16.22<br>n=6    | 0.14 ± 0.06<br>n=6   | 0.05 ± 0.02<br>n=6                | 0.23 ± 0.08<br>n=2  | 0.00 ± NA<br>n=1                   | 0.06 ± 0.03<br>n=6  | 6.90 ± 0.50<br>n=6  |
| 5) Mekong               | Cambodia | No dam             | 18.82 ± 10.35<br>n=18   | 0.07 ± 0.03<br>n=18  | 0.05 ± 0.02<br>n=18               | 0.26 ± 0.11<br>n=11 | 0.01 ± 0.00<br>n=5                 | 0.05 ± 0.03<br>n=18 | 7.64 ± 0.52<br>n=18 |
| 6) Neak Luong           | Cambodia | No dam             | 20.67 ± 9.32<br>n=18    | 0.08 ± 0.03<br>n=18  | 0.04 ± 0.02<br>n=18               | 0.27 ± 0.11<br>n=11 | 0.01 ± 0.00<br>n=5                 | 0.05 ± 0.02<br>n=18 | 7.10 ± 0.39<br>n=18 |
| 7) Phnom Krom           | Cambodia | No dam             | 222.19 ± 152.11<br>n=15 | 0.17 ± 0.08<br>n=15  | 0.12 ± 0.07<br>n=15               | 0.57 ± 0.27<br>n=11 | 0.01 ± NA<br>n=1                   | 0.26 ± 0.15<br>n=15 | 6.15 ± 0.73<br>n=15 |
| 8) Tonle Sap            | Cambodia | No dam             | 40.15 ± 13.87<br>n=18   | 0.24 ± 0.11<br>n=18  | 0.07 ± 0.03<br>n=18               | 0.50 ± 0.27<br>n=11 | 0.02 ± 0.01<br>n=5                 | 0.10 ± 0.06<br>n=18 | 6.07 ± 0.87<br>n=18 |
| 9) Ban Hat Kham         | Laos     | Upstream           | 22.90 ± 14.80<br>n=18   | 0.14 ± 0.10<br>n=18  | 0.04 ± 0.03<br>n=18               | 0.40 ± 0.21<br>n=12 | 0.01 ± 0.00<br>n=6                 | 0.05 ± 0.04<br>n=18 | 7.02 ± 0.72<br>n=18 |
| 10) Ban Keng Done       | Laos     | No dam             | 32.33 ± 19.76<br>n=18   | 0.11 ± 0.07<br>n=18  | 0.04 ± 0.02<br>n=18               | 0.37 ± 0.16<br>n=12 | 0.01 ± 0.01<br>n=6                 | 0.05 ± 0.04<br>n=18 | 7.10 ± 0.63<br>n=18 |
| 11) Houay Mak Hiao      | Laos     | No dam             | 39.94 ± 52.30<br>n=15   | 0.92 ± 0.55<br>n=15  | 0.48 ± 0.45<br>n=15               | 2.54 ± 1.15<br>n=12 | 0.05 ± 0.04<br>n=3                 | 0.10 ± 0.05<br>n=15 | 4.20 ± 0.72<br>n=15 |
| 12) Nam Houm Dam        | Laos     | Upstream           | 9.03 ± 2.55<br>n=9      | 0.04 ± 0.03<br>n=9   | 0.07 ± 0.03<br>n=9                | 1.51 ± 1.73<br>n=3  | 0.01 ± 0.01<br>n=6                 | 0.02 ± 0.00<br>n=9  | 7.38 ± 0.50<br>n=9  |
| 13) Nam Ngum            | Laos     | Downstream         | 5.09 ± 2.47<br>n=9      | 0.05 ± 0.03<br>n=9   | 0.04 ± 0.02<br>n=9                | 0.30 ± 0.15<br>n=3  | 0.00 ± 0.00<br>n=6                 | 0.08 ± 0.20<br>n=9  | 5.02 ± 0.37<br>n=9  |
| 14) Nam Souang          | Laos     | Upstream           | 21.14 ± 36.14<br>n=9    | 0.15 ± 0.29<br>n=9   | 0.05 ± 0.01<br>n=9                | 0.39 ± 0.12<br>n=3  | 0.12 ± 0.27<br>n=6                 | 0.02 ± 0.00<br>n=9  | 7.06 ± 0.37<br>n=9  |
| 15) Se Bang Fai         | Laos     | No dam             | 25.36 ± 19.53<br>n=18   | 0.12 ± 0.08<br>n=18  | 0.04 ± 0.02<br>n=18               | 0.89 ± 1.48<br>n=12 | 0.01 ± 0.00<br>n=6                 | 0.04 ± 0.04<br>n=18 | 7.29 ± 0.70<br>n=18 |
| 16) Sedone Bridge       | Laos     | Upstream           | 32.91 ± 21.74<br>n=15   | 0.15 ± 0.09<br>n=15  | 0.08 ± 0.07<br>n=15               | 0.47 ± 0.21<br>n=12 | 0.01 ± 0.01<br>n=3                 | 0.07 ± 0.04<br>n=15 | 6.48 ± 0.60<br>n=14 |
| 17) Thaleth Keokou      | Laos     | Upstream           | 19.51 ± 11.62<br>n=9    | 0.06 ± 0.05<br>n=9   | 0.04 ± 0.03<br>n=9                | 0.32 ± 0.12<br>n=3  | 0.01 ± 0.00<br>n=6                 | 0.02 ± 0.00<br>n=9  | 7.71 ± 0.82<br>n=9  |
| 18) Ban Chai Buri       | Thailand | Upstream           | 6.75 ± 5.79<br>n=15     | 0.22 ± 0.10<br>n=15  | 0.06 ± 0.03<br>n=15               | 0.69 ± 0.60<br>n=15 | 0.00 ± 0.00<br>n=2                 | 0.04 ± 0.02<br>n=15 | 7.70 ± 0.67<br>n=15 |
| 19) Ban Ku Phra<br>Kona | Thailand | Upstream           | 34.67 ± 15.97<br>n=5    | 0.47 ± 0.66<br>n=5   | 0.17 ± 0.11<br>n=5                | 0.77 ± 0.31<br>n=4  | 0.02 ± 0.01<br>n=5                 | 0.06 ± 0.03<br>n=5  | 6.75 ± 1.04<br>n=5  |

|                         |          |            |                       |                     |                     |                     |                    |                     |                     |
|-------------------------|----------|------------|-----------------------|---------------------|---------------------|---------------------|--------------------|---------------------|---------------------|
| 20) Ban Som             | Thailand | No dam     | 39.71 ± 24.09<br>n=5  | 0.60 ± 0.21<br>n=5  | 0.14 ± 0.06<br>n=5  | 1.08 ± 0.33<br>n=4  | 0.08 ± 0.06<br>n=5 | 0.16 ± 0.08<br>n=5  | 6.17 ± 1.10<br>n=5  |
| 21) Ban Tad Ton         | Thailand | Upstream   | 29.84 ± 22.45<br>n=5  | 0.38 ± 0.26<br>n=5  | 0.09 ± 0.07<br>n=5  | 0.43 ± 0.03<br>n=4  | 0.01 ± 0.00<br>n=5 | 0.03 ± 0.02<br>n=5  | 8.24 ± 0.78<br>n=5  |
| 22) Chiang Rai          | Thailand | Downstream | 61.47 ± 48.63<br>n=18 | 0.27 ± 0.14<br>n=18 | 0.05 ± 0.02<br>n=18 | 0.54 ± 0.32<br>n=18 | 0.03 ± 0.01<br>n=6 | 0.11 ± 0.04<br>n=18 | 7.88 ± 0.52<br>n=18 |
| 23) Lam Dom Noi         | Thailand | Downstream | 24.42 ± 24.85<br>n=6  | 0.07 ± 0.03<br>n=6  | 0.06 ± 0.04<br>n=6  | 0.50 ± 0.38<br>n=6  | 0.00 ± 0.00<br>n=6 | 0.02 ± 0.01<br>n=6  | 7.86 ± 0.74<br>n=6  |
| 24) Lam Pao Dam<br>Site | Thailand | Upstream   | 30.03 ± 21.36<br>n=5  | 0.19 ± 0.15<br>n=5  | 0.06 ± 0.03<br>n=5  | 0.43 ± 0.12<br>n=4  | 0.01 ± 0.00<br>n=5 | 0.02 ± 0.01<br>n=5  | 8.17 ± 0.56<br>n=5  |
| 25) Nam Kae             | Thailand | Upstream   | 14.54 ± 22.01<br>n=18 | 0.09 ± 0.11<br>n=18 | 0.05 ± 0.03<br>n=18 | 0.46 ± 0.27<br>n=18 | 0.01 ± 0.00<br>n=6 | 0.03 ± 0.02<br>n=18 | 7.33 ± 0.67<br>n=18 |

Supplementary Material 2. Watershed-station names and mean (2000-2017) water quality parameters ± standard deviation in the wet season. “n” refers to number of observations.

| Station name       | Country  | Location of Dam | TSS mg/L                | NO <sub>3</sub> <sup>-</sup> mg/L | NH <sub>4</sub> <sup>+</sup> mg/L | TN mg/L             | PO <sub>4</sub> <sup>3-</sup> mg/L | TP mg/L             | DO mg/L             |
|--------------------|----------|-----------------|-------------------------|-----------------------------------|-----------------------------------|---------------------|------------------------------------|---------------------|---------------------|
| 1) Backprea        | Cambodia | No dam          | 58.70 ± 32.55<br>n=14   | 0.12 ± 0.05<br>n=14               | 0.09 ± 0.05<br>n=14               | 0.40 ± 0.11<br>n=10 | 0.05 ± NA<br>n=1                   | 0.14 ± 0.05<br>n=14 | 5.24 ± 1.59<br>n=14 |
| 2) Kampong Thom    | Cambodia | Upstream        | 87.06 ± 22.68<br>n=5    | 0.11 ± 0.03<br>n=5                | 0.05 ± 0.03<br>n=5                | 0.29 ± NA<br>n=1    | 0.01 ± NA<br>n=1                   | 0.10 ± 0.05<br>n=5  | 6.61 ± 0.26<br>n=5  |
| 3) Kampong Toul    | Cambodia | Upstream        | 124.33 ± 25.15<br>n=4   | 0.11 ± 0.04<br>n=4                | 0.04 ± 0.02<br>n=4                | NA ± NA             | 0.02 ± 0.01<br>n=4                 | 0.05 ± 0.04<br>n=4  | 6.59 ± 0.23<br>n=4  |
| 4) Kampong Thmar   | Cambodia | Upstream        | 49.86 ± 18.31<br>n=5    | 0.10 ± 0.04<br>n=5                | 0.05 ± 0.02<br>n=5                | 0.26 ± NA<br>n=1    | 0.00 ± NA<br>n=1                   | 0.09 ± 0.06<br>n=5  | 6.98 ± 0.57<br>n=5  |
| 5) Mekong          | Cambodia | No dam          | 134.15 ± 39.09<br>n=18  | 0.23 ± 0.04<br>n=18               | 0.05 ± 0.03<br>n=18               | 0.43 ± 0.07<br>n=10 | 0.02 ± 0.01<br>n=5                 | 0.13 ± 0.07<br>n=18 | 7.09 ± 0.32<br>n=18 |
| 6) Neak Luong      | Cambodia | No dam          | 131.85 ± 28.75<br>n=18  | 0.22 ± 0.04<br>n=18               | 0.05 ± 0.02<br>n=18               | 0.41 ± 0.07<br>n=10 | 0.01 ± 0.01<br>n=5                 | 0.14 ± 0.08<br>n=18 | 6.98 ± 0.36<br>n=18 |
| 7) Phnom Krom      | Cambodia | No dam          | 233.19 ± 156.78<br>n=14 | 0.16 ± 0.07<br>n=14               | 0.09 ± 0.05<br>n=14               | 0.57 ± 0.23<br>n=10 | 0.01 ± NA<br>n=1                   | 0.30 ± 0.20<br>n=14 | 6.88 ± 0.85<br>n=14 |
| 8) Tonle Sap       | Cambodia | No dam          | 68.82 ± 25.93<br>n=18   | 0.17 ± 0.07<br>n=18               | 0.04 ± 0.02<br>n=18               | 0.37 ± 0.11<br>n=10 | 0.02 ± 0.01<br>n=5                 | 0.11 ± 0.06<br>n=18 | 6.28 ± 0.46<br>n=18 |
| 9) Ban Hat Kham    | Laos     | Upstream        | 198.49 ± 148.53<br>n=18 | 0.20 ± 0.06<br>n=18               | 0.04 ± 0.02<br>n=18               | 0.47 ± 0.20<br>n=11 | 0.03 ± 0.00<br>n=6                 | 0.07 ± 0.04<br>n=18 | 6.83 ± 0.79<br>n=17 |
| 10) Ban Keng Done  | Laos     | No dam          | 140.84 ± 74.35<br>n=18  | 0.19 ± 0.08<br>n=18               | 0.06 ± 0.03<br>n=18               | 0.47 ± 0.18<br>n=11 | 0.03 ± 0.01<br>n=6                 | 0.09 ± 0.08<br>n=18 | 6.82 ± 0.81<br>n=17 |
| 11) Houay Mak Hiao | Laos     | No dam          | 50.08 ± 22.91<br>n=14   | 0.52 ± 0.26<br>n=14               | 0.21 ± 0.11<br>n=14               | 1.39 ± 0.79<br>n=11 | 0.03 ± 0.01<br>n=2                 | 0.10 ± 0.05<br>n=14 | 3.34 ± 0.51<br>n=14 |
| 12) Nam Houm Dam   | Laos     | Upstream        | 19.96 ± 12.69<br>n=9    | 0.04 ± 0.02<br>n=9                | 0.09 ± 0.05<br>n=9                | 0.59 ± 0.02<br>n=2  | 0.02 ± 0.01<br>n=6                 | 0.03 ± 0.01<br>n=9  | 6.93 ± 0.42<br>n=9  |

|                      |          |           |                |             |             |             |             |             |             |
|----------------------|----------|-----------|----------------|-------------|-------------|-------------|-------------|-------------|-------------|
| 13) Nam Ngum         | Laos     | Downstrea | 13.56 ± 6.40   | 0.09 ± 0.05 | 0.05 ± 0.04 | 0.31 ± 0.15 | 0.01 ± 0.01 | 0.02 ± 0.01 | 4.68 ± 0.76 |
|                      |          | m         | n=9            | n=9         | n=9         | n=2         | n=6         | n=9         | n=9         |
| 14) Nam Souang       | Laos     | Upstream  | 15.23 ± 7.68   | 0.07 ± 0.04 | 0.05 ± 0.02 | 0.42 ± 0.22 | 0.01 ± 0.01 | 0.02 ± 0.01 | 6.89 ± 0.43 |
|                      |          |           | n=8            | n=8         | n=8         | n=2         | n=5         | n=8         | n=8         |
| 15) Se Bang Fai      | Laos     | No dam    | 91.32 ± 50.75  | 0.25 ± 0.06 | 0.05 ± 0.03 | 0.60 ± 0.32 | 0.01 ± 0.00 | 0.05 ± 0.06 | 7.06 ± 0.84 |
|                      |          |           | n=18           | n=18        | n=18        | n=11        | n=6         | n=18        | n=17        |
| 16) Sedone Bridge    | Laos     | Upstream  | 96.90 ± 28.69  | 0.18 ± 0.07 | 0.07 ± 0.04 | 0.47 ± 0.14 | 0.04 ± 0.02 | 0.08 ± 0.04 | 6.62 ± 0.83 |
|                      |          |           | n=14           | n=14        | n=14        | n=11        | n=2         | n=13        | n=13        |
| 17) Thaleth Keokou   | Laos     | Upstream  | 74.26 ± 22.94  | 0.13 ± 0.03 | 0.04 ± 0.02 | 0.36 ± 0.16 | 0.02 ± 0.01 | 0.03 ± 0.01 | 7.10 ± 0.33 |
|                      |          |           | n=9            | n=9         | n=9         | n=2         | n=6         | n=9         | n=9         |
| 8) Ban Chai Buri     | Thailand | Upstrea   | 19.10 ± 10.27  | 0.13 ± 0.03 | 0.07 ± 0.02 | 0.55 ±      | 0.01 ± NA   | 0.06 ± 0.02 | 4.92 ± 0.52 |
|                      |          | m         | n=14           | n=14        | n=14        | 0.33 ±      | n=1         | n=14        | n=14        |
| 19) Ban Ku Phra Kona | Thailand | Upstrea   | 52.50 ± 33.60  | 0.25 ± 0.02 | 0.13 ± 0.05 | 0.67 ±      | 0.02 ± 0.00 | 0.06 ± 0.01 | 6.70 ± 0.44 |
|                      |          | m         | n=4            | n=4         | n=4         | 0.17 ±      | n=4         | n=4         | n=4         |
| 20) Ban Som          | Thailand | No dam    | 51.54 ± 9.43   | 0.42 ± 0.08 | 0.06 ± 0.02 | 0.73 ±      | 0.03 ± 0.01 | 0.06 ± 0.02 | 6.74 ± 0.46 |
|                      |          |           | n=4            | n=4         | n=4         | 0.17 ±      | n=4         | n=4         | n=4         |
| 21) Ban Tad Ton      | Thailand | Upstrea   | 35.67 ± 15.68  | 0.31 ± 0.07 | 0.08 ± 0.05 | 0.54 ±      | 0.01 ± 0.00 | 0.02 ± 0.00 | 8.43 ± 0.46 |
|                      |          | m         | n=4            | n=4         | n=4         | 0.13 ±      | n=4         | n=4         | n=4         |
| 22) Chiang Rai       | Thailand | Downstr   | 193.10 ± 61.22 | 0.29 ± 0.07 | 0.06 ± 0.04 | 0.68 ±      | 0.03 ± 0.01 | 0.20 ± 0.06 | 7.52 ± 0.50 |
|                      |          |           | n=18           | n=18        | n=18        | 0.29 ±      | n=5         | n=18        | n=18        |
| 23) Lam Dom Noi      | Thailand | Downstr   | 14.42 ± 12.05  | 0.13 ± 0.12 | 0.09 ± 0.06 | 0.50 ±      | 0.00 ± 0.00 | 0.01 ± 0.00 | 7.65 ± 0.72 |
|                      |          | eam       | n=6            | n=6         | n=6         | 0.25 ±      | n=5         | n=6         | n=6         |
| 24) Lam Pao Dam Site | Thailand | Upstrea   | 31.54 ± 13.39  | 0.29 ± 0.05 | 0.08 ± 0.03 | 0.62 ±0.21  | 0.01 ± 0.01 | 0.03 ± 0.02 | 8.34 ± 0.81 |
|                      |          | m         | n=4            | n=4         | n=4         | n=4         | n=4         | n=4         | n=4         |
| 25) Nam Kae          | Thailand | Upstrea   | 29.32 ± 14.00  | 0.11 ± 0.10 | 0.06 ± 0.03 | 0.45 ±      | 0.01 ± 0.00 | 0.04 ± 0.02 | 6.72 ± 0.91 |
|                      |          | m         | n=18           | n=18        | n=18        | 0.22 ±      | n=5         | n=18        | n=18        |

Supplementary Material 3. Correlation analysis between land use categories and water quality parameters in the dry season for the watersheds of our study in the Lower Mekong Basin.

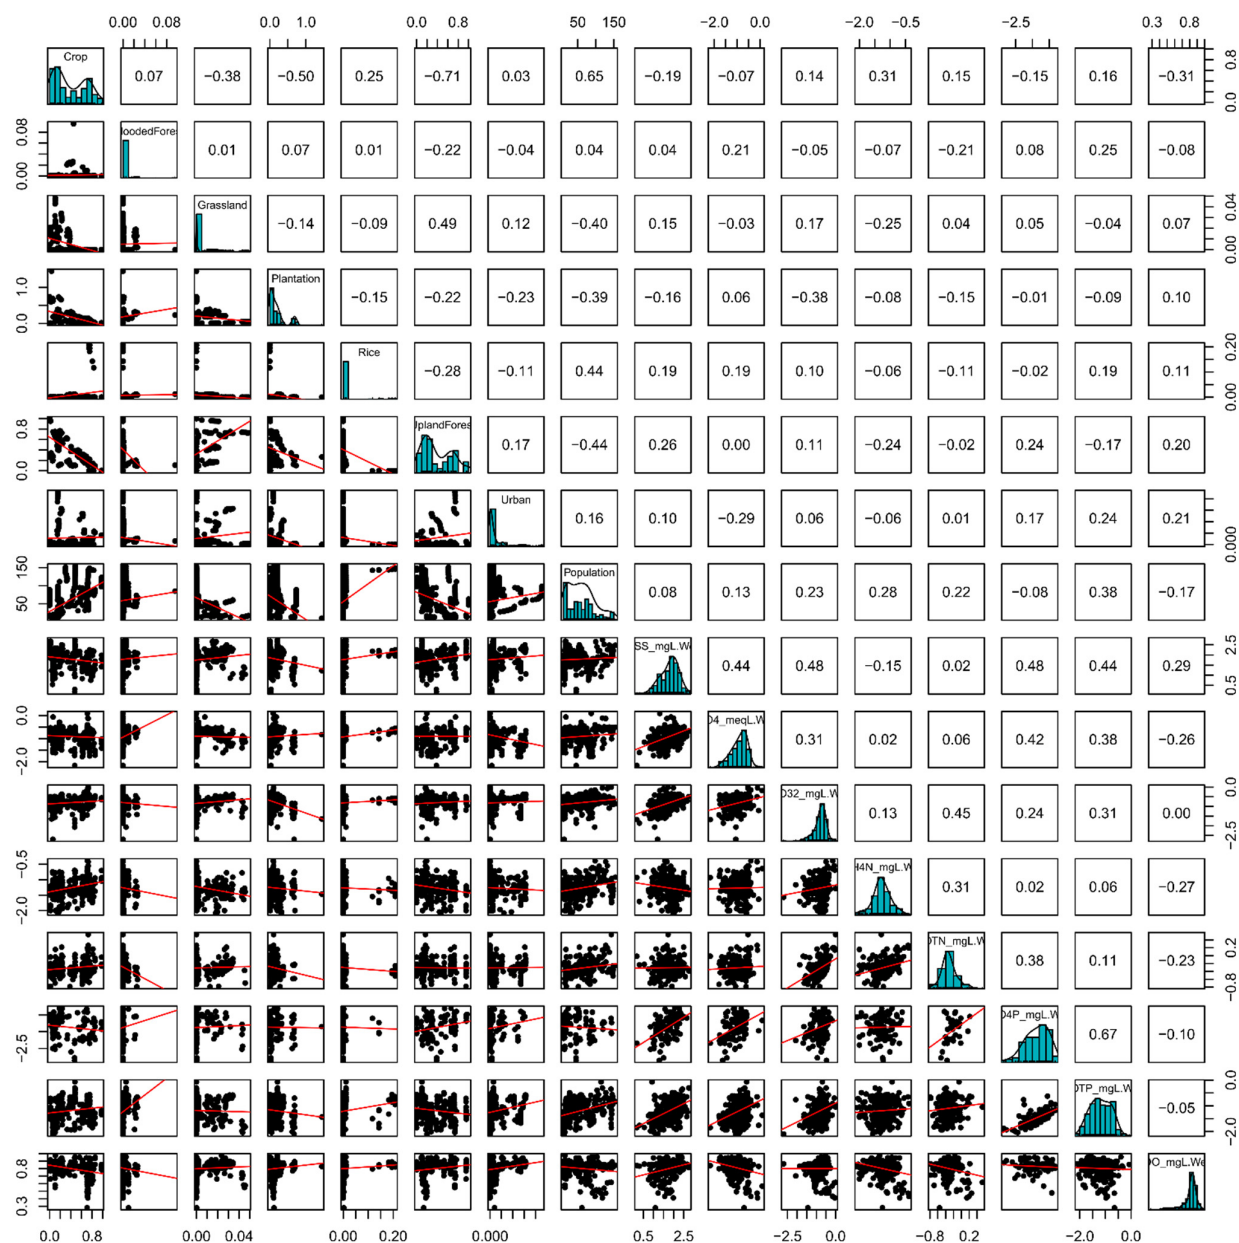

Supplementary Material 4. Correlation analysis between land use categories and water quality parameters in the wet season for the watersheds of our study in the Lower Mekong Basin.

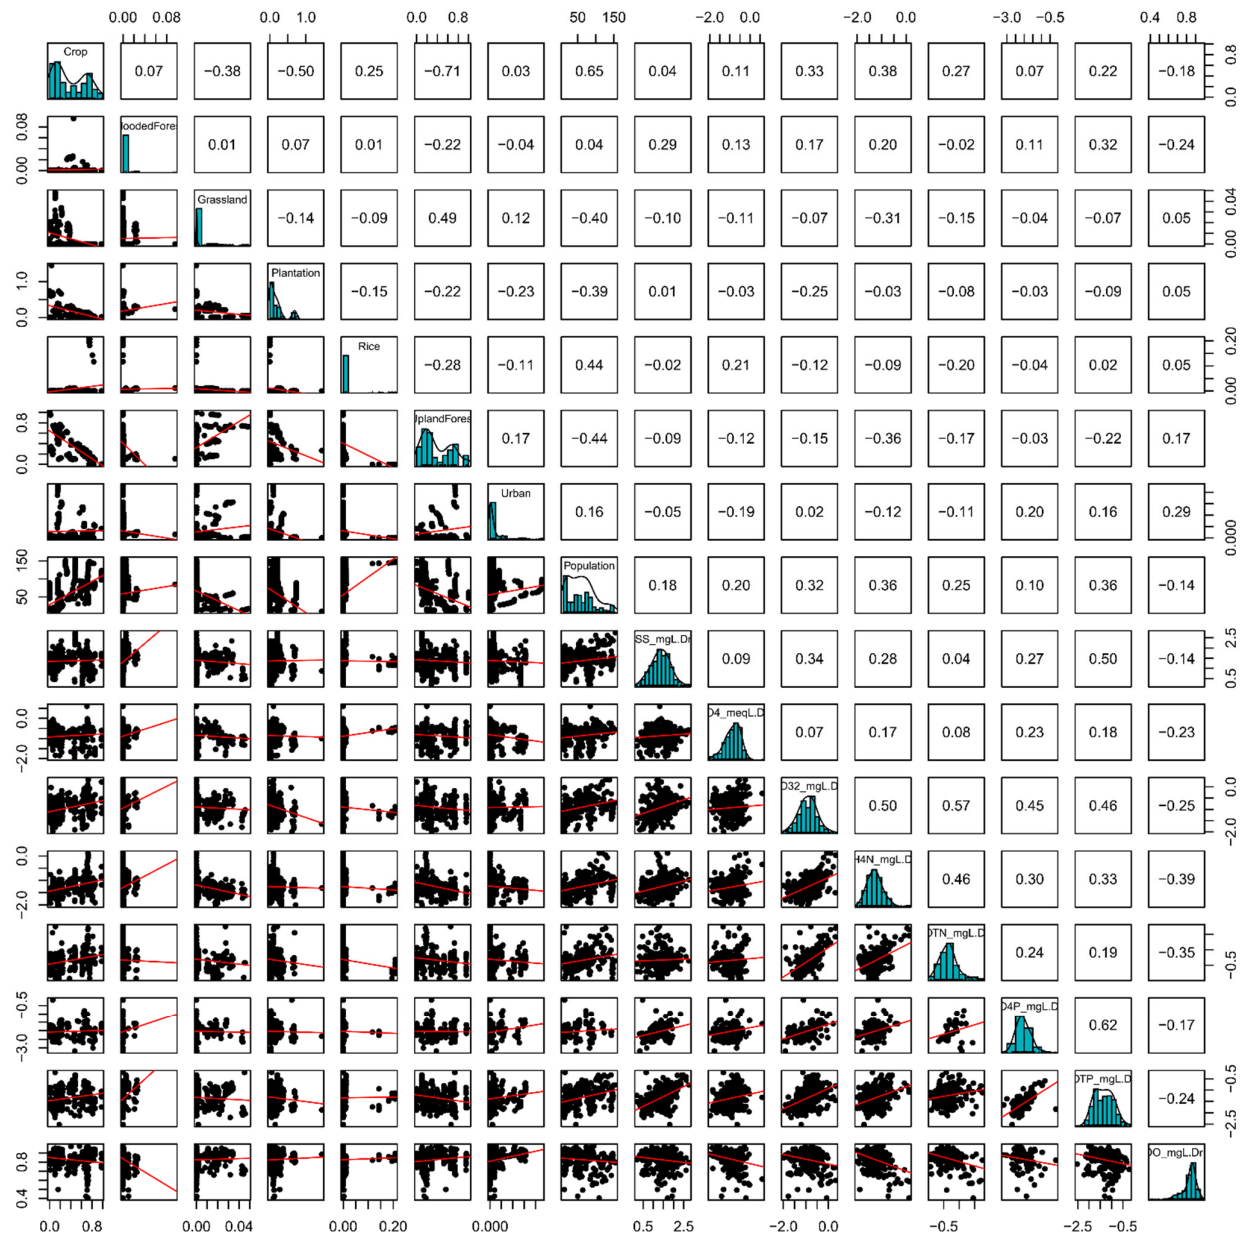

Supplement: s1 [file s1]
